# Supplementary material for: Micro-aerobic digestion of high-solid anaerobically digested sludge: further stabilization, microbial dynamics and phytotoxicity reduction
Source: Royal Society of Chemistry journal article supplement (doi:10.1039/c6ra11964f), 2016-01-01
Supplement: c6ra11964f1.pdf [file c6ra11964f1.pdf]

Supplied Materials

1  
2  
3  
4  
5  
6  
7  
8  
9  
10  
11  
12  
13  
14  
15  
16  
17  
18  
19  
20  
21

**Micro-aerobic digestion of high-solid anaerobically digested sludge: further  
stabilization, microbial dynamics and phytotoxicity reduction**

Xiaowei Li <sup>2,1</sup>, Zonghan Li<sup>1</sup>, Xiaohu Dai<sup>1\*</sup>, Bin Dong<sup>1\*</sup>, Yanfei, Tang<sup>1</sup>

<sup>1</sup>State Key Laboratory of Pollution Control and Resources Reuse, National  
Engineering Research Center for Urban Pollution Control, College of Environmental  
Science and Engineering, Tongji University, Shanghai 200092, PR China

<sup>2</sup>School of Environmental and Chemical Engineering, Shanghai University, Shanghai  
200444, China

\*Corresponding author. E-mail: lixiaowei419@163.com (Dai X), 84370169@qq.com  
(Dong B)

The Number of Pages: 8  
The Number of Tables: 1  
The Number of Figures: 6

22 Table S1 Summary of Illumina MiSeq sequencing data of the samples

| Samples                            | Influent sludge<br>(IS) | Effluent sludge (ES) |         |         |
|------------------------------------|-------------------------|----------------------|---------|---------|
|                                    |                         | 25 °C                | 37 °C   | 55 °C   |
| number of sequences                | 15356                   | 10482                | 14182   | 10027   |
| Total length of sequences (bp)     | 6569991                 | 4595719              | 6172200 | 4393712 |
| Average length of sequences (bp)   | 428                     | 438                  | 435     | 438     |
| Operational taxonomic units (OTUs) | 149                     | 146                  | 142     | 144     |
| Chao value                         | 158                     | 152                  | 150     | 162     |
| ACE value                          | 153                     | 153                  | 150     | 163     |

23

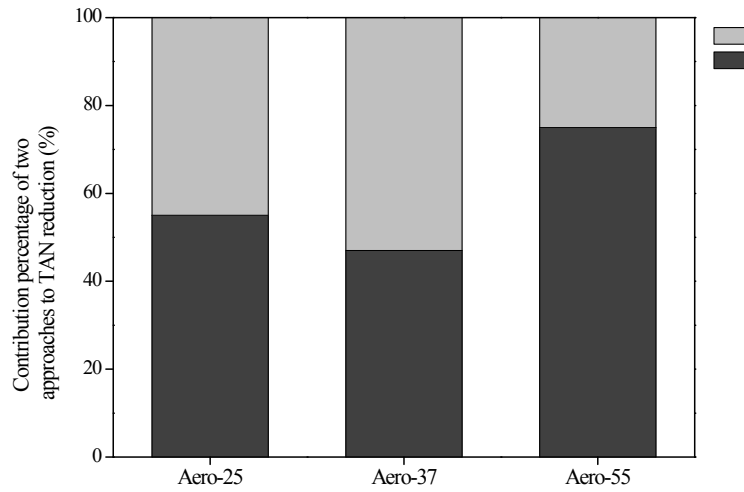

25  
 26 Fig. S1 Contribution of nitrification/denitrification and stripping to TAN reduction in three micro-  
 27 aerobic digesters. Aero-25, Aero-37 and Aero-55, Aerobic digesters operated at 25 °C, 37 °C and  
 28 55 °C

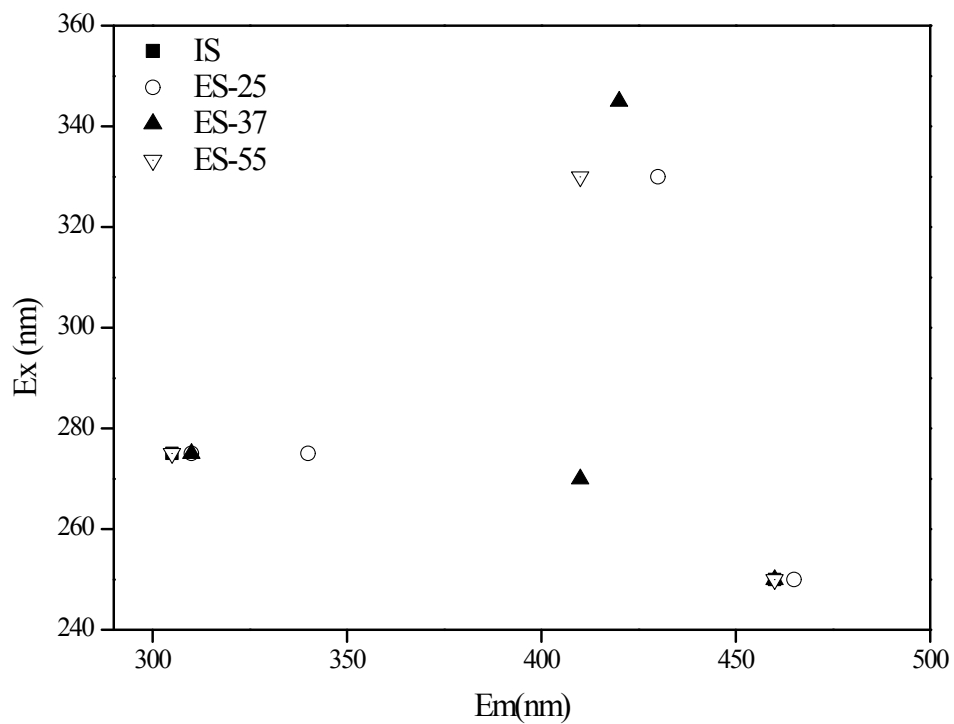

29  
 30 Fig. S2 Distribution of excitation-emission matrix maxima from influent and effluent sludges of  
 31 micro-aerobic digesters at 25, 37 and 55 °C (IS, ES-25, ES-37, ES-55)

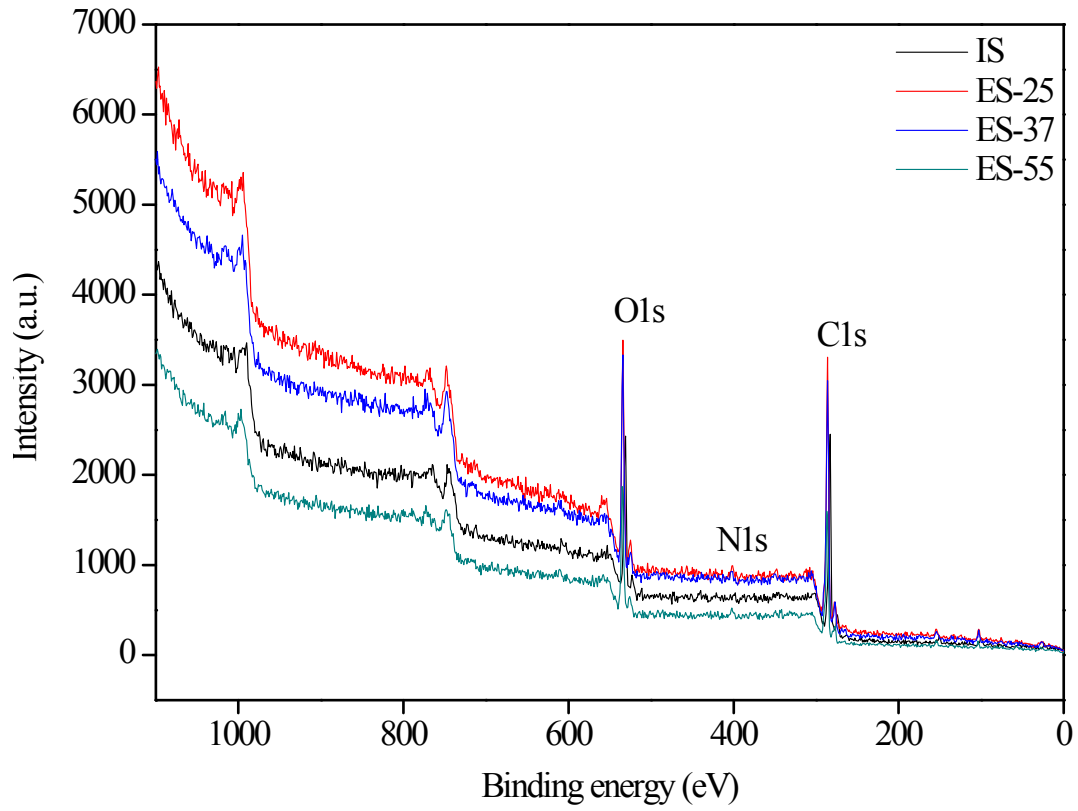

32  
33 Fig. S3 XPS full spectra of four sludge samples. IS, influent sludge; ES-25, ES-37 and ES-55,  
34 effluent sludge from the micro-aerobic digesters operated at 25, 37 and 55 °C, respectively.

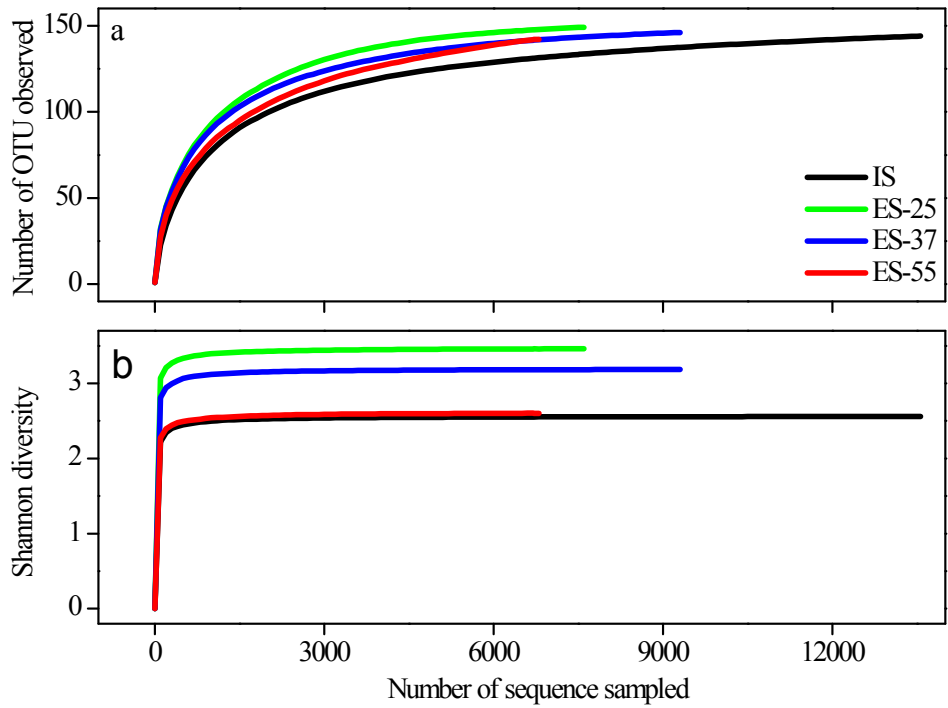

36  
 37 Fig. S4 Rarefaction (a) and Shannon diversity (b) curves of the samples at 3% cutoff OTU level

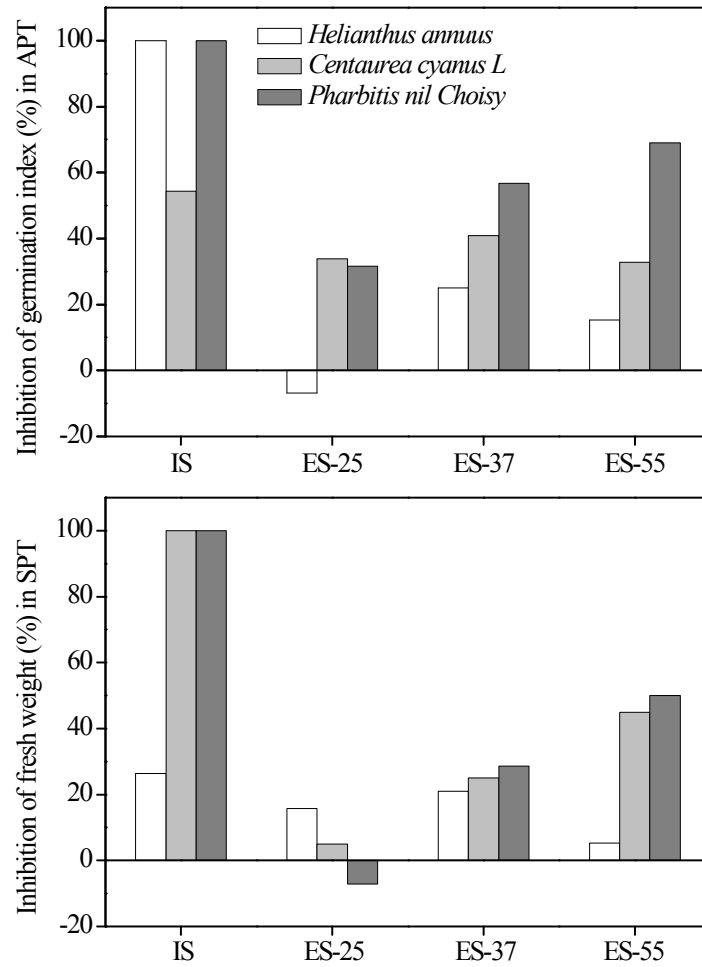

39  
 40 Fig. S5 Acute and subchronic phytotoxicity test of the influent and effluent sludges samples using  
 41 three types of seeds (*Helianthus annuus*, *Centaurea cyanus L.* and *Pharbitis nil Choisy*). APT,  
 42 acute phytotoxicity test; SPT, subchronic phytotoxicity test; IS, influent sludge; ES-25, ES-37 and  
 43 ES-55, effluent sludge from the micro-aerobic digesters operated at 25, 37 and 55 °C, respectively.  
 44

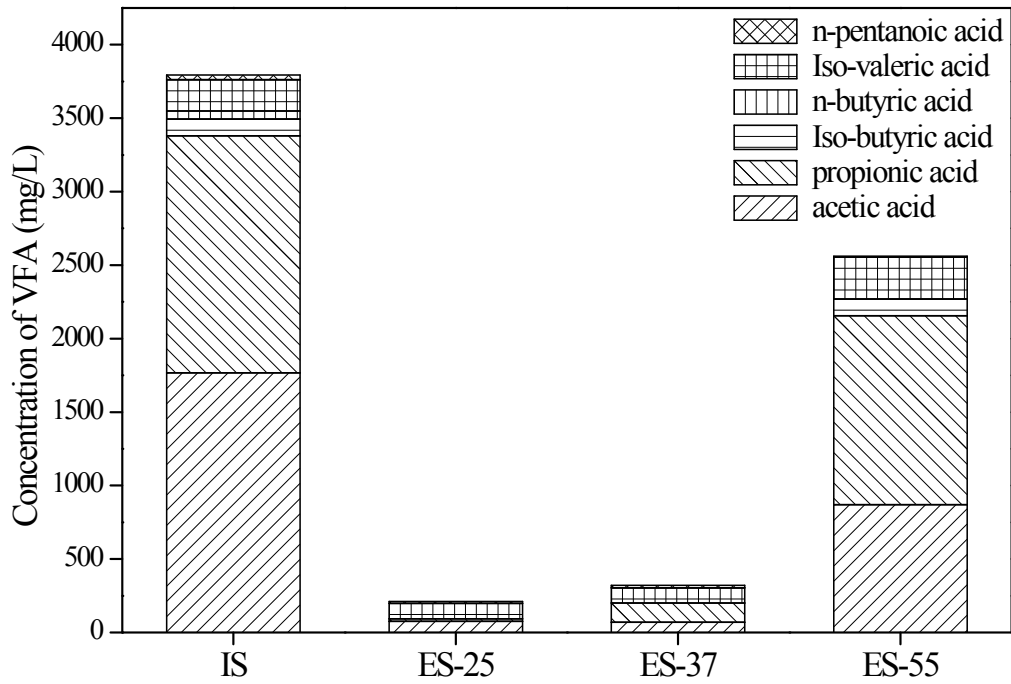

45  
 46 Fig. S6 Changes in the contents of volatile fatty acid (VFA) in the influent and effluent sludges of  
 47 three micro-aerobic digesters at the steady operation. IS, influent sludge; ES-25, ES-37 and ES-55,  
 48 the effluent sludge from the micro-aerobic digestion reactors operated at 25 °C, 37 °C and 55 °C,  
 49 respectively; controls, the sludge was replaced by the peat.
